# Supplementary material for: The Association of Vitamin D and Its Pathway Genes’ Polymorphisms with Hypertensive Disorders of Pregnancy: A Prospective Cohort Study
Source: MDPI journal article supplement (doi:10.3390/nu14112355), 2022-06-06
Supplement: s1 [file s1]

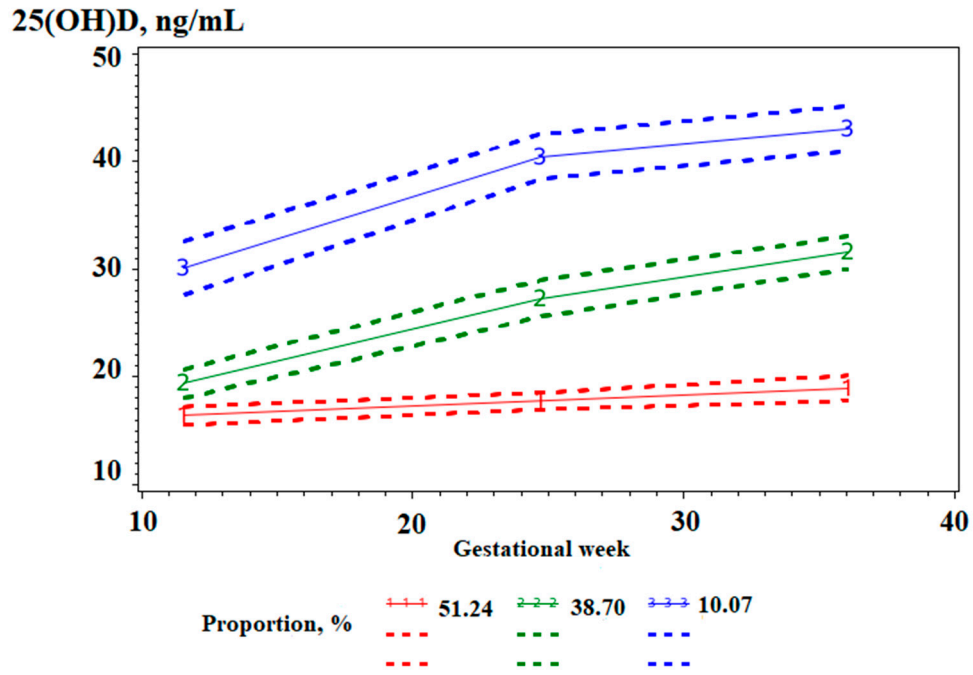

Figure S1. Trajectory of 25(OH)D level during pregnancy

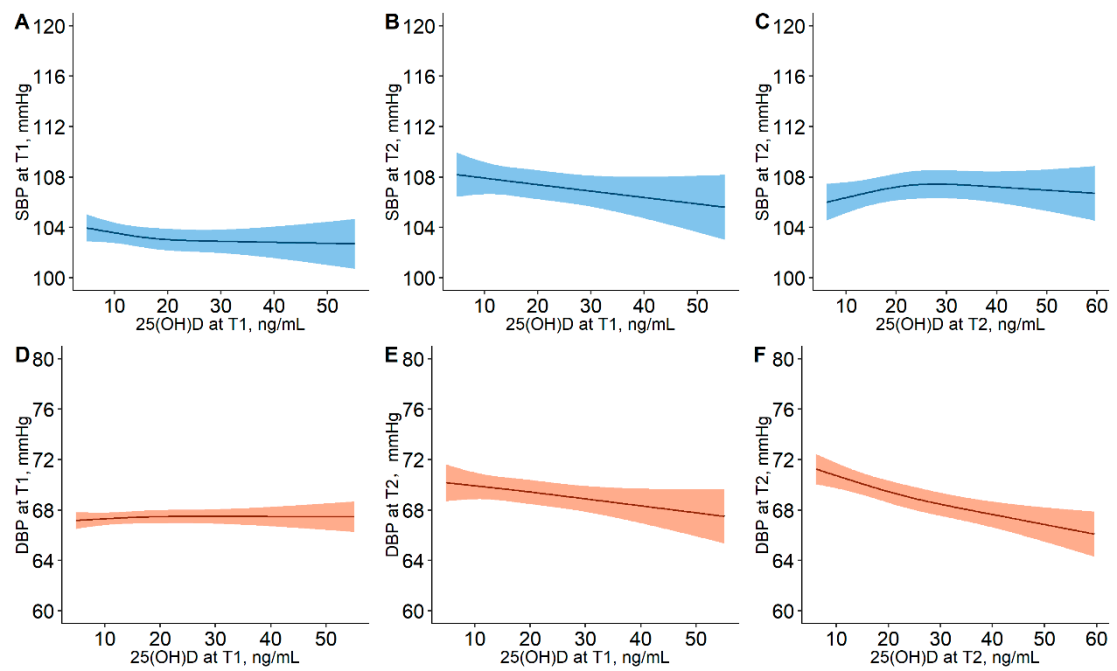

Figure S2. Dose-response relationships of 25(OH)D levels at T1 and T2 with blood pressure at T1 and T2.

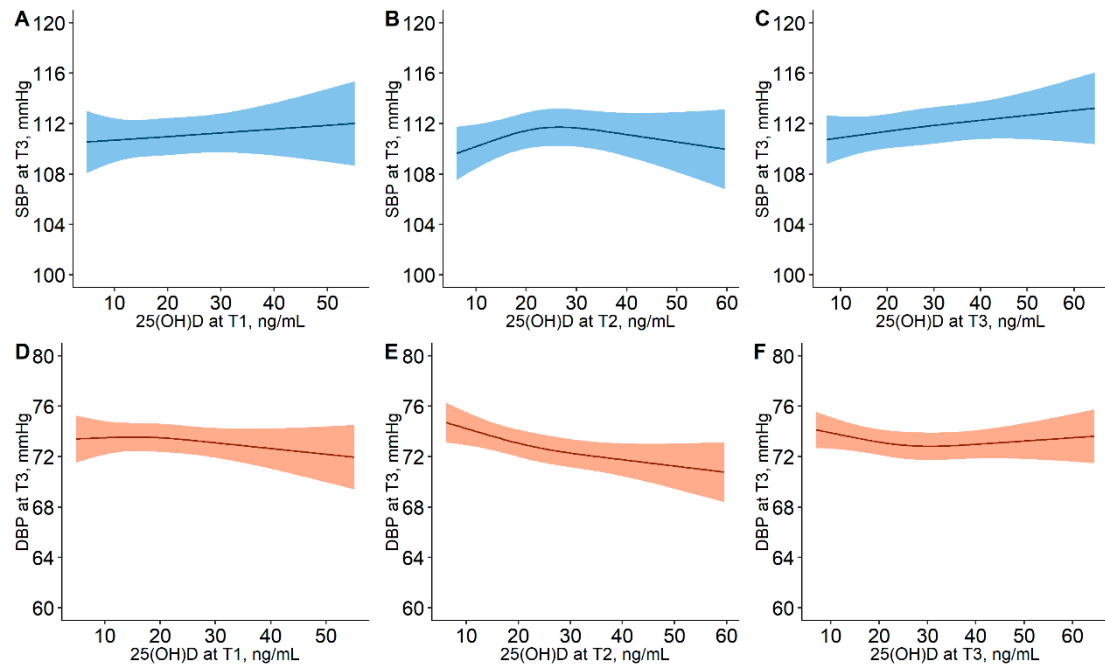

Figure S3. Dose-response relationships of 25(OH)D levels at T1, T2 and T3 with blood pressure at T3.

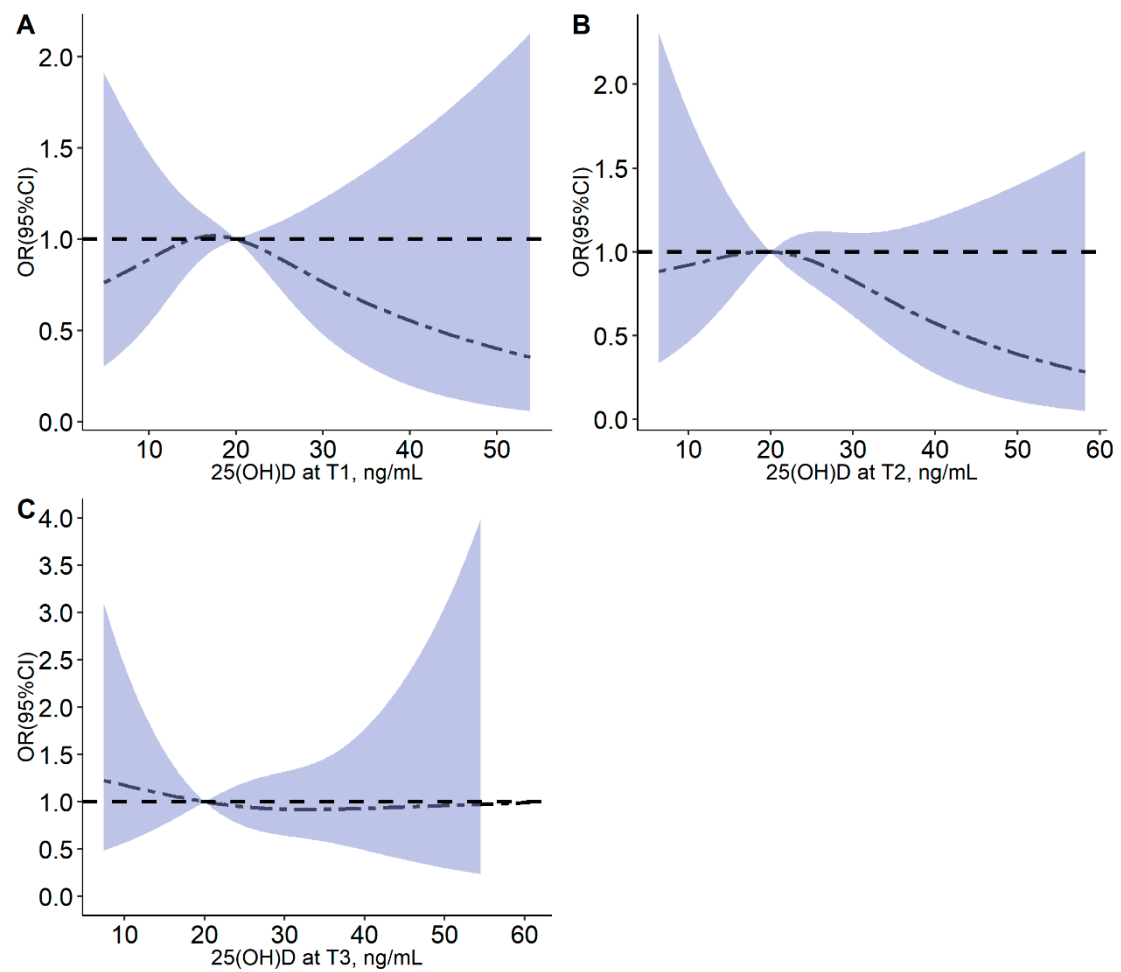

Figure S4. Dose-response relationships of 25(OH)D levels at T1, T2 and T3 with HDP.

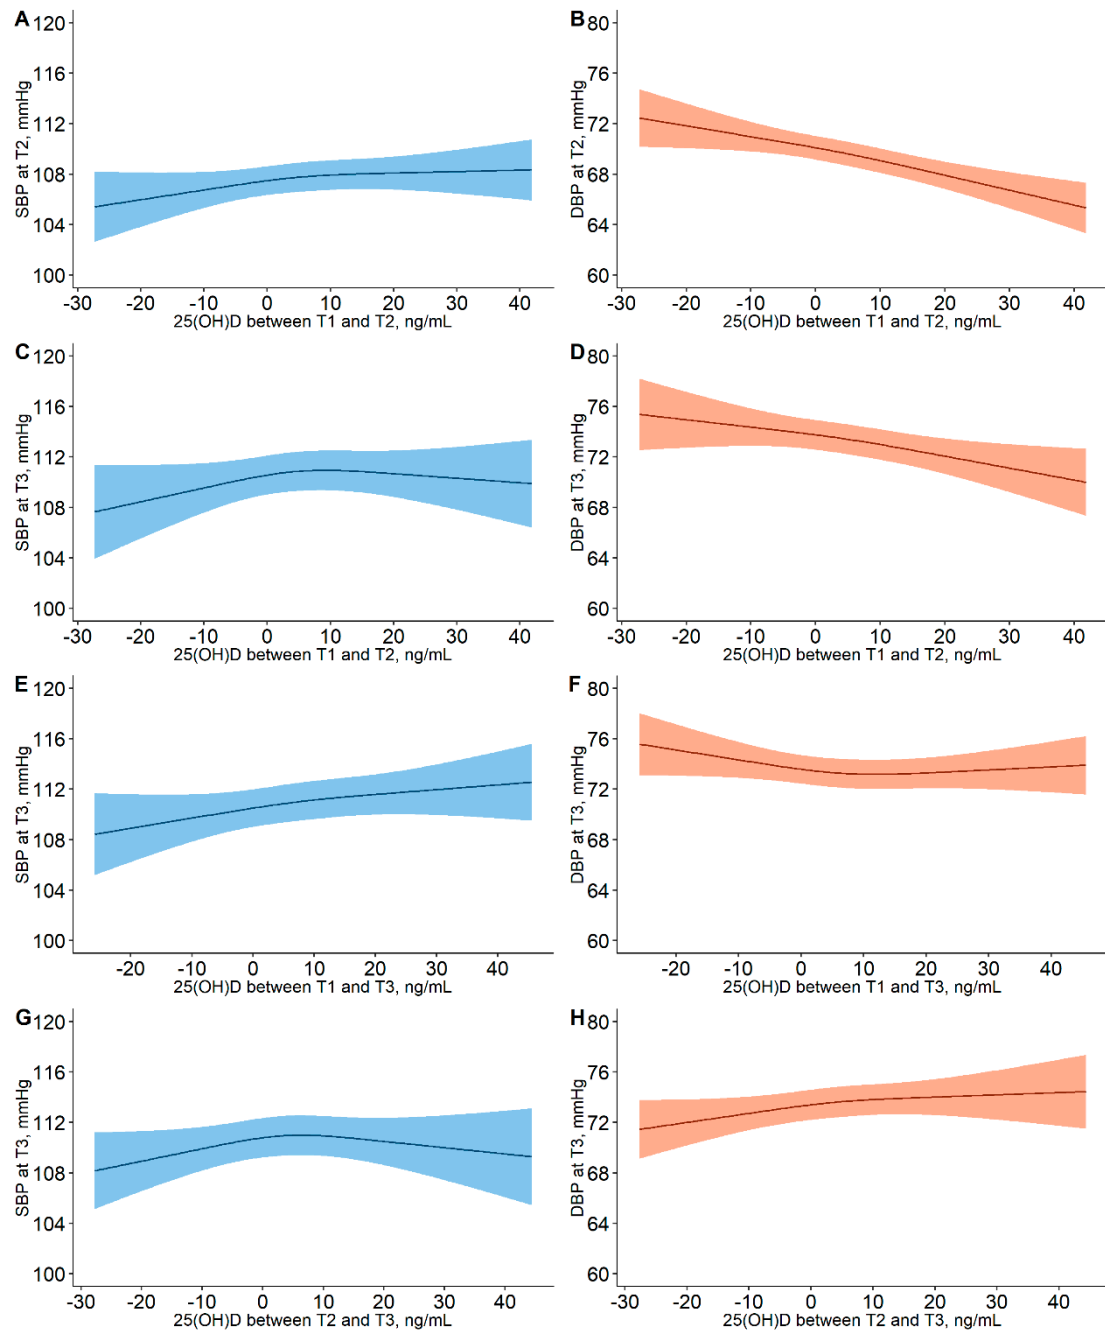

Figure S5. Dose-response relationships of the change of 25(OH)D levels during pregnancy with blood pressure at T2 and T3.

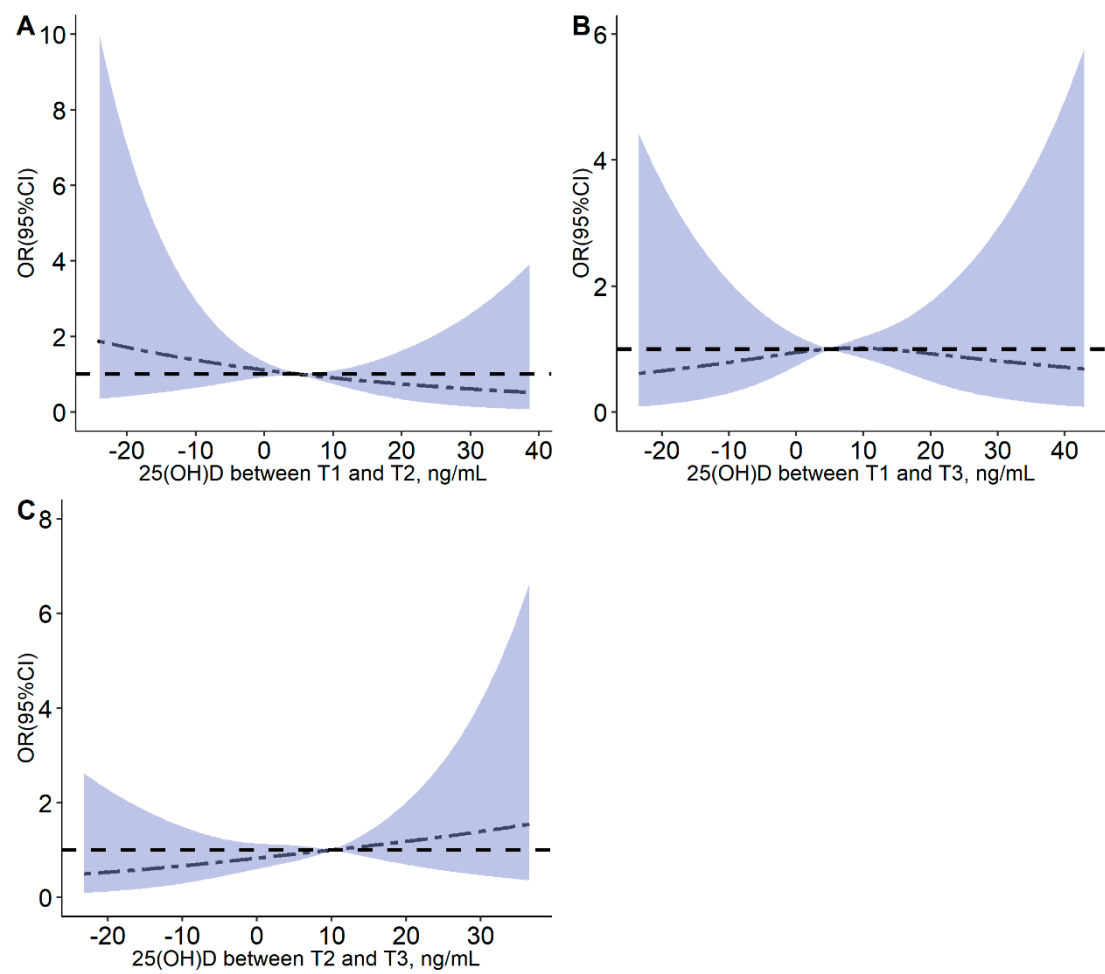

Figure S6. Dose-response relationships between the change of 25(OH)D levels during pregnancy and HDP.

Table S1. Baseline characteristics of pregnant women in SNP analysis.

| Variables                            | Non-HDP (N=2638) | HDP (N=72)   | <i>P</i> * |
|--------------------------------------|------------------|--------------|------------|
|                                      | Mean ± SD        |              |            |
| Age, years                           | 28.73±3.63       | 29.71±4.11   | 0.0242     |
| Pre-pregnancy BMI, kg/m <sup>2</sup> | 21.13±2.91       | 23.79±4.22   | <.0001     |
| T1 (N=2464)                          |                  |              |            |
| Weight gain, kg                      | 0.00±0.18        | 0.01±0.12    | 0.6163     |
| SBP, mmHg                            | 103.36±9.15      | 112.87±11.09 | <.0001     |
| DBP, mmHg                            | 68.33±6.67       | 74.27±6.13   | <.0001     |
| 25(OH)D, ng/mL                       | 18.37±8.57       | 17.78±7.10   | 0.5774     |
| T2 (N=1965)                          |                  |              |            |
| Weight gain, kg                      | 5.53±3.76        | 6.14±4.50    | 0.253      |
| SBP, mmHg                            | 107.27±9.31      | 116.67±15.00 | <.0001     |
| DBP, mmHg                            | 69.18±7.82       | 76.62±8.97   | <.0001     |
| 25(OH)D, ng/mL                       | 23.38±10.39      | 23.55±9.93   | 0.9093     |
| T3 (N=1263)                          |                  |              |            |
| Weight gain, kg                      | 11.84±3.70       | 11.32±4.19   | 0.4063     |
| SBP, mmHg                            | 108.84±9.75      | 121.69±15.52 | <.0001     |
| DBP, mmHg                            | 70.80±7.52       | 81.81±8.18   | <.0001     |
| 25(OH)D, ng/mL                       | 26.45±11.18      | 27.33±11.17  | 0.6422     |
|                                      | N (%)            |              |            |
| VitD deficiency at T1 <sup>a</sup>   | 1554 (64.83)     | 46 (68.66)   | 0.5175     |
| VitD deficiency at T2 <sup>b</sup>   | 829 (43.34)      | 24 (46.15)   | 0.6857     |
| VitD deficiency at T3 <sup>c</sup>   | 396 (32.27)      | 10 (27.78)   | 0.5691     |
| Educational level                    |                  |              | 0.2972     |
| ≤High school                         | 732 (27.75)      | 24 (33.33)   |            |
| >High school                         | 1906 (72.25)     | 48 (66.67)   |            |
| Gravity                              |                  |              | 0.7966     |
| 1                                    | 1228 (46.55)     | 31 (43.06)   |            |
| ≥2                                   | 1324 (50.19)     | 39 (54.17)   |            |
| Unknown                              | 86 (3.26)        | 2 (2.78)     |            |
| Parity                               |                  |              | 0.7934     |
| 0                                    | 1442 (54.66)     | 42 (58.33)   |            |
| ≥1                                   | 591 (22.40)      | 14 (19.44)   |            |
| Unknown                              | 605 (22.93)      | 16 (22.22)   |            |

---

Abbreviations: HDP, hypertensive disorders in pregnancy; BMI, body mass index; SBP, systolic blood pressure; DBP, diastolic blood pressure; VitD, vitamin D.

<sup>a</sup> N=2464, <sup>b</sup> N=1965, <sup>c</sup> N=1263

Table S2. The relationship of VitD deficiency in three trimesters with blood pressure.

| Variables                 | SBP, mmHg    |          | DBP, mmHg    |          |
|---------------------------|--------------|----------|--------------|----------|
|                           | $\beta$ (se) | <i>P</i> | $\beta$ (se) | <i>P</i> |
| <b>SBP at T1 (N=3302)</b> |              |          |              |          |
| VitD deficiency at T1     |              |          |              |          |
| No                        | Ref          |          | Ref          |          |
| Yes                       | 0.15 (0.35)  | 0.6666   | -0.20 (0.25) | 0.4291   |
| <b>SBP at T2 (N=2479)</b> |              |          |              |          |
| VitD deficiency at T1     |              |          |              |          |
| No                        | Ref          |          | Ref          |          |
| Yes                       | 0.87 (0.43)  | 0.0415   | 0.81 (0.35)  | 0.0201   |
| VitD deficiency at T2     |              |          |              |          |
| No                        | Ref          |          | Ref          |          |
| Yes                       | -0.78 (0.41) | 0.0595   | 1.43 (0.34)  | <.0001   |
| <b>SBP at T3 (N=1549)</b> |              |          |              |          |
| VitD deficiency at T1     |              |          |              |          |
| No                        | Ref          |          | Ref          |          |
| Yes                       | -0.44 (0.56) | 0.4320   | 0.43 (0.43)  | 0.3116   |
| VitD deficiency at T2     |              |          |              |          |
| No                        | Ref          |          | Ref          |          |
| Yes                       | -0.73 (0.56) | 0.1992   | 1.43 (0.43)  | 0.0009   |
| VitD deficiency at T3     |              |          |              |          |
| No                        | Ref          |          | Ref          |          |
| Yes                       | -0.85 (0.56) | 0.1269   | 0.07 (0.45)  | 0.8800   |

Abbreviations: SBP, systolic blood pressure; DBP, diastolic blood pressure; VitD, vitamin D.

Adjusted for pre-pregnancy BMI, maternal age, gestational weight gain, gestational week, educational level, parity, basal blood pressure and the seasons of blood pressure measurement.

Table S3. The association between 25(OH)D levels in three trimesters and HDP.

| Trimesters | Non-HDP | HDP | HDP               |          |
|------------|---------|-----|-------------------|----------|
|            | N       |     | OR (95%CI)        | <i>P</i> |
| T1         | 3207    | 95  | 1.00 (0.97, 1.03) | 0.9083   |
| T2         | 2417    | 62  | 0.99 (0.96, 1.01) | 0.2871   |
| T3         | 1505    | 44  | 1.00 (0.97, 1.03) | 0.7259   |

Abbreviations: HDP, hypertensive disorders of pregnancy.

Adjusted for pre-pregnancy BMI, maternal age, gestational weight gain, gestational week, educational level, parity, basal blood pressure and the seasons of blood pressure measurement.



Table S4. The relationship between VitD deficiency in three trimesters with HDP.

| Variables             | Non-HDP | HDP | HDP               |          |
|-----------------------|---------|-----|-------------------|----------|
|                       | N       |     | OR (95%CI)        | <i>P</i> |
| VitD deficiency at T1 |         |     |                   |          |
| No                    | 1031    | 29  | Ref               |          |
| Yes                   | 2176    | 66  | 1.08 (0.68, 1.72) | 0.7479   |
| VitD deficiency at T2 |         |     |                   |          |
| No                    | 1350    | 32  | Ref               |          |
| Yes                   | 1067    | 30  | 1.37 (0.80, 2.36) | 0.2529   |
| VitD deficiency at T3 |         |     |                   |          |
| No                    | 1029    | 31  | Ref               |          |
| Yes                   | 476     | 13  | 1.02 (0.49, 2.11) | 0.9616   |

Abbreviations: HDP, hypertensive disorders of pregnancy; VitD, vitamin D.

Adjusted for pre-pregnancy BMI, maternal age, gestational weight gain, gestational week, educational level, parity, basal blood pressure and the seasons of blood pressure measurement.

Table S5. The association between the change of 25(OH)D levels during pregnancy and HDP.

| The change of trimesters | N    | the change of 25(OH)D levels, ng/mL * | HDP               |          |
|--------------------------|------|---------------------------------------|-------------------|----------|
|                          |      |                                       | OR (95%CI)        | <i>P</i> |
| From T1 to T2            | 2125 | 3.50 (84.59)                          | 0.99 (0.96, 1.02) | 0.4123   |
| From T1 to T3            | 1328 | 6.59 (98.02)                          | 1.00 (0.97, 1.03) | 0.9190   |
| From T2 to T3            | 1212 | 3.19 (87.23)                          | 1.02 (0.99, 1.05) | 0.2827   |

Abbreviations: HDP, hypertensive disorders in pregnancy.

\* Presented as the median (range).

Adjusted for pre-pregnancy BMI, maternal age, gestational weight gain, gestational week, educational level, parity, basal blood pressure and the seasons of blood pressure measurement.

Table S6. The association between the trajectory of VitD during pregnancy and HDP.

| Trajectory of VitD | Non-HDP | HDP | HDP               |          |
|--------------------|---------|-----|-------------------|----------|
|                    | N       |     | OR (95%CI)        | <i>P</i> |
| 1                  | 602     | 19  | Ref               |          |
| 2                  | 455     | 14  | 0.84 (0.40, 1.75) | 0.6418   |
| 3                  | 120     | 2   | 0.46 (0.10, 2.20) | 0.3320   |

Abbreviations: VitD, vitamin D; HDP, hypertensive disorders in pregnancy.

Adjusted for pre-pregnancy BMI, maternal age, educational level, parity and basal blood pressure.

Table S7. The association of single SNP with SBP and DBP at T1.

| SNP            | Genotype | N    | SBP, mmHg   |             |        | DBP, mmHg  |             |        |
|----------------|----------|------|-------------|-------------|--------|------------|-------------|--------|
|                |          |      | Mean ± SD   | β(se)       | P      | Mean ± SD  | β(se)       | P      |
| <i>CYP24A1</i> |          |      |             |             |        |            |             |        |
| rs2209314      | TT       | 876  | 103.74±9.46 | Ref         |        | 68.44±6.69 | Ref         |        |
|                | CT       | 1181 | 103.59±9.34 | -0.19(0.41) | 0.634  | 68.58±6.75 | 0.13(0.29)  | 0.6451 |
|                | CC       | 390  | 103.52±9.04 | -0.27(0.55) | 0.6277 | 68.44±6.76 | -0.01(0.40) | 0.9812 |
| rs2248137      | GG       | 837  | 103.57±9.40 | Ref         |        | 68.86±6.86 | Ref         |        |
|                | GC       | 434  | 104.70±10.2 | 1.34(0.55)  | 0.015  | 68.26±6.88 | -0.40(0.39) | 0.3063 |
|                | CC       | 597  | 103.14±8.93 | -0.24(0.49) | 0.6267 | 68.17±6.61 | -0.51(0.35) | 0.1524 |
| rs2762934      | GG       | 586  | 104.33±9.29 | Ref         |        | 67.90±6.43 | Ref         |        |
|                | GA       | 117  | 105.04±11.9 | 0.55(0.96)  | 0.5687 | 66.84±7.36 | -1.23(0.64) | 0.0565 |
|                | AA       | 7    | 108.43±12.7 | 5.45(3.61)  | 0.1314 | 71.57±6.65 | 4.76(2.42)  | 0.0498 |
| rs6013897      | TT       | 518  | 104.46±9.41 | Ref         |        | 67.87±6.55 | Ref         |        |
|                | AT       | 168  | 105.23±10.9 | 0.86(0.84)  | 0.3092 | 67.87±6.95 | 0.02(0.57)  | 0.9709 |
|                | AA       | 22   | 100.18±8.14 | -3.37(2.07) | 0.1032 | 65.41±4.98 | -1.91(1.40) | 0.1717 |
| rs6127118      | GG       | 870  | 103.66±9.26 | Ref         |        | 68.49±6.74 | Ref         |        |

|                       |    |      |             |             |        |            |             |        |
|-----------------------|----|------|-------------|-------------|--------|------------|-------------|--------|
|                       | AG | 1466 | 103.50±9.18 | -0.13(0.39) | 0.7441 | 68.57±6.70 | 0.08(0.28)  | 0.7666 |
|                       | AA | 116  | 105.13±11.7 | 1.33(0.90)  | 0.1405 | 67.76±6.87 | -0.76(0.65) | 0.2384 |
| <b><i>CYP27B1</i></b> |    |      |             |             |        |            |             |        |
| rs10877012            | TT | 1024 | 103.74±9.22 | Ref         |        | 68.76±6.90 | Ref         |        |
|                       | GT | 1097 | 103.71±9.73 | 0.04(0.40)  | 0.9187 | 68.36±6.70 | -0.32(0.28) | 0.265  |
|                       | GG | 322  | 102.92±8.30 | -0.50(0.58) | 0.3859 | 68.20±6.27 | -0.34(0.42) | 0.4108 |
| <b><i>CYP3A4</i></b>  |    |      |             |             |        |            |             |        |
| rs2242480             | CC | 1389 | 103.56±9.39 | Ref         |        | 68.42±6.77 | Ref         |        |
|                       | CT | 918  | 103.80±9.15 | 0.28(0.39)  | 0.4777 | 68.60±6.64 | 0.14(0.28)  | 0.6161 |
|                       | TT | 141  | 103.35±10.1 | -0.23(0.80) | 0.773  | 68.70±6.67 | 0.26(0.57)  | 0.6464 |
| rs4646437             | GG | 521  | 104.40±9.65 | Ref         |        | 67.40±6.23 | Ref         |        |
|                       | AG | 176  | 104.93±10.0 | 0.20(0.83)  | 0.8058 | 68.92±7.49 | 0.74(0.47)  | 0.1137 |
|                       | AA | 12   | 102.83±12.8 | -0.56(2.78) | 0.8398 | 66.92±7.67 | -0.18(1.57) | 0.9109 |
| <b><i>GC</i></b>      |    |      |             |             |        |            |             |        |
| rs1155563             | TT | 862  | 103.75±9.19 | Ref         |        | 68.52±6.69 | Ref         |        |
|                       | TC | 1167 | 103.49±9.28 | -0.26(0.41) | 0.5237 | 68.45±6.71 | -0.07(0.29) | 0.8163 |
|                       | CC | 417  | 103.84±9.74 | 0.03(0.54)  | 0.9594 | 68.64±6.86 | 0.03(0.39)  | 0.9398 |

|            |    |      |             |             |        |            |             |        |
|------------|----|------|-------------|-------------|--------|------------|-------------|--------|
| rs12512631 | TT | 456  | 104.55±9.90 | Ref         |        | 67.81±6.87 | Ref         |        |
|            | CT | 233  | 104.37±9.73 | 0.28(0.77)  | 0.7163 | 67.75±6.19 | 0.29(0.52)  | 0.5697 |
|            | CC | 18   | 104.44±8.56 | -1.10(2.29) | 0.6324 | 67.50±5.60 | -0.78(1.55) | 0.6133 |
| rs16846876 | AA | 1151 | 103.70±9.53 | Ref         |        | 68.49±6.76 | Ref         |        |
|            | AT | 1038 | 103.59±9.01 | -0.12(0.39) | 0.7548 | 68.46±6.58 | -0.02(0.28) | 0.9436 |
|            | TT | 264  | 103.58±9.78 | -0.30(0.62) | 0.6281 | 68.71±7.13 | 0.05(0.44)  | 0.9161 |
| rs17467825 | AA | 1139 | 103.74±9.44 | Ref         |        | 68.55±6.77 | Ref         |        |
|            | GA | 1043 | 103.28±9.06 | -0.50(0.39) | 0.2032 | 68.26±6.58 | -0.32(0.28) | 0.2528 |
|            | GG | 275  | 104.43±9.86 | 0.52(0.61)  | 0.3958 | 69.18±7.04 | 0.44(0.44)  | 0.3126 |
| rs2070741  | TT | 485  | 104.74±9.68 | Ref         |        | 68.05±6.48 | Ref         |        |
|            | GT | 209  | 103.83±10.1 | -0.73(0.78) | 0.354  | 67.04±6.87 | -0.86(0.53) | 0.1037 |
|            | GG | 17   | 105.59±9.10 | -0.15(2.33) | 0.9494 | 67.82±6.69 | -0.91(1.58) | 0.5649 |
| rs222020   | TT | 264  | 103.98±8.93 | Ref         |        | 67.55±6.23 | Ref         |        |
|            | CT | 339  | 104.58±10.2 | 0.53(0.78)  | 0.4936 | 68.04±6.98 | 0.42(0.52)  | 0.4261 |
|            | CC | 106  | 105.54±10.7 | 1.50(1.09)  | 0.1691 | 67.36±6.33 | -0.28(0.73) | 0.7037 |
| rs2282679  | TT | 1137 | 103.76±9.46 | Ref         |        | 68.54±6.79 | Ref         |        |
|            | GT | 1038 | 103.31±9.05 | -0.49(0.39) | 0.2096 | 68.29±6.57 | -0.27(0.28) | 0.3294 |

|           |    |      |             |             |        |            |             |        |
|-----------|----|------|-------------|-------------|--------|------------|-------------|--------|
| rs2298849 | GG | 280  | 104.35±9.83 | 0.40(0.61)  | 0.5052 | 69.13±7.02 | 0.39(0.43)  | 0.3669 |
|           | AA | 1024 | 103.59±9.30 | Ref         |        | 68.62±6.72 | Ref         |        |
|           | GA | 1111 | 103.52±9.18 | -0.14(0.39) | 0.7309 | 68.48±6.75 | -0.20(0.28) | 0.4784 |
| rs2298850 | GG | 324  | 104.04±9.92 | 0.27(0.58)  | 0.6368 | 68.17±6.67 | -0.60(0.41) | 0.1499 |
|           | GG | 1113 | 103.79±9.49 | Ref         |        | 68.59±6.81 | Ref         |        |
|           | CG | 1048 | 103.26±9.04 | -0.55(0.39) | 0.1591 | 68.25±6.56 | -0.35(0.28) | 0.217  |
| rs3755967 | CC | 278  | 104.37±9.86 | 0.41(0.61)  | 0.5029 | 69.10±7.02 | 0.34(0.44)  | 0.4403 |
|           | CC | 1133 | 103.77±9.45 | Ref         |        | 68.55±6.79 | Ref         |        |
|           | CT | 1046 | 103.29±9.04 | -0.50(0.39) | 0.1989 | 68.28±6.56 | -0.29(0.28) | 0.3026 |
| rs4588    | TT | 280  | 104.35±9.83 | 0.40(0.61)  | 0.5088 | 69.13±7.02 | 0.38(0.43)  | 0.3758 |
|           | GG | 1124 | 103.79±9.47 | Ref         |        | 68.60±6.80 | Ref         |        |
|           | GT | 1044 | 103.28±9.04 | -0.52(0.39) | 0.1803 | 68.24±6.57 | -0.36(0.28) | 0.1972 |
| rs7041    | TT | 279  | 104.36±9.84 | 0.39(0.61)  | 0.5197 | 69.09±7.01 | 0.31(0.44)  | 0.478  |
|           | AA | 1315 | 103.61±9.24 | Ref         |        | 68.53±6.76 | Ref         |        |
|           | CA | 970  | 103.46±9.28 | -0.05(0.38) | 0.9036 | 68.40±6.64 | -0.03(0.28) | 0.9146 |
|           | CC | 170  | 104.57±10.3 | 1.10(0.74)  | 0.137  | 68.76±7.04 | 0.34(0.53)  | 0.5244 |

***LRP2***

|            |    |      |             |             |        |            |             |        |
|------------|----|------|-------------|-------------|--------|------------|-------------|--------|
| rs10210408 | CC | 815  | 103.48±9.01 | Ref         |        | 68.43±6.63 | Ref         |        |
|            | TC | 1200 | 103.65±9.39 | 0.13(0.41)  | 0.7513 | 68.60±6.73 | 0.12(0.30)  | 0.6733 |
|            | TT | 445  | 103.87±9.75 | 0.35(0.53)  | 0.5183 | 68.33±6.88 | -0.12(0.38) | 0.7632 |
| rs2228171  | TT | 839  | 103.38±8.86 | Ref         |        | 68.52±6.65 | Ref         |        |
|            | CT | 378  | 104.78±10.1 | 1.56(0.56)  | 0.0057 | 67.65±6.70 | -0.68(0.40) | 0.0877 |
|            | CC | 278  | 105.02±9.86 | 1.80(0.63)  | 0.0041 | 68.55±6.62 | 0.21(0.44)  | 0.6335 |
| rs2389557  | AA | 191  | 103.64±9.28 | Ref         |        | 67.81±6.51 | Ref         |        |
|            | GA | 355  | 105.02±10.2 | 1.53(0.85)  | 0.0718 | 67.81±6.61 | 0.13(0.57)  | 0.8263 |
|            | GG | 162  | 104.50±9.34 | 0.76(1.01)  | 0.4537 | 67.69±6.78 | -0.16(0.68) | 0.8205 |
| rs2544381  | GG | 382  | 104.54±9.88 | Ref         |        | 68.03±6.72 | Ref         |        |
|            | CG | 275  | 104.46±9.81 | 0.35(0.75)  | 0.647  | 67.46±6.57 | -0.27(0.51) | 0.5979 |
|            | CC | 52   | 104.38±9.35 | -0.16(1.41) | 0.9106 | 67.37±6.03 | -0.64(0.95) | 0.4972 |
| rs2544390  | CC | 195  | 104.39±9.53 | Ref         |        | 67.83±6.50 | Ref         |        |
|            | CT | 361  | 104.35±9.66 | 0.00(0.85)  | 0.9983 | 67.87±6.80 | 0.08(0.57)  | 0.8833 |
|            | TT | 152  | 104.95±10.5 | 0.65(1.03)  | 0.5292 | 67.46±6.29 | -0.30(0.69) | 0.6654 |
| rs4667591  | TT | 239  | 103.13±9.54 | Ref         |        | 67.33±6.49 | Ref         |        |
|            | GT | 339  | 105.06±9.95 | 2.18(0.80)  | 0.0065 | 67.82±6.66 | 0.58(0.54)  | 0.2849 |



|                   |    |      |             |             |        |            |             |        |
|-------------------|----|------|-------------|-------------|--------|------------|-------------|--------|
| rs7600336         | GG | 131  | 105.54±9.71 | 2.63(1.03)  | 0.0106 | 68.50±6.68 | 1.21(0.70)  | 0.082  |
|                   | CC | 228  | 103.50±8.82 | Ref         |        | 67.38±6.04 | Ref         |        |
|                   | TC | 338  | 104.97±9.74 | 1.51(0.81)  | 0.0624 | 68.09±6.80 | 0.72(0.55)  | 0.1899 |
|                   | TT | 145  | 104.92±11.2 | 1.45(1.00)  | 0.1489 | 67.52±7.01 | 0.15(0.68)  | 0.8282 |
| <b><i>VDR</i></b> |    |      |             |             |        |            |             |        |
| rs10783219        | AA | 911  | 103.65±9.22 | Ref         |        | 68.39±6.71 | Ref         |        |
|                   | TA | 1151 | 103.47±8.99 | -0.29(0.40) | 0.4765 | 68.60±6.68 | 0.12(0.29)  | 0.6849 |
|                   | TT | 393  | 104.00±10.5 | 0.42(0.55)  | 0.4481 | 68.44±6.88 | 0.10(0.39)  | 0.7918 |
| rs11568820        | CC | 216  | 105.33±11.3 | Ref         |        | 67.94±7.25 | Ref         |        |
|                   | TC | 341  | 104.31±9.23 | -0.92(0.82) | 0.2663 | 67.93±6.36 | 0.09(0.55)  | 0.8753 |
|                   | TT | 150  | 103.53±8.66 | -1.41(1.01) | 0.163  | 67.03±6.13 | -0.68(0.68) | 0.3164 |
| rs2228570         | GG | 208  | 105.00±9.98 | Ref         |        | 67.80±6.59 | Ref         |        |
|                   | GA | 357  | 104.59±9.89 | -0.29(0.83) | 0.7252 | 67.82±6.65 | 0.12(0.56)  | 0.8289 |
|                   | AA | 144  | 103.56±9.32 | -1.03(1.03) | 0.3168 | 67.55±6.58 | 0.05(0.69)  | 0.9374 |
| rs2238136         | CC | 474  | 104.58±9.97 | Ref         |        | 67.76±6.66 | Ref         |        |
|                   | TC | 212  | 104.30±9.61 | -0.37(0.79) | 0.6399 | 67.40±6.46 | -0.36(0.53) | 0.4895 |
|                   | TT | 24   | 104.75±8.13 | 0.26(1.98)  | 0.8949 | 71.33±6.10 | 3.58(1.33)  | 0.0073 |

|           |    |     |             |             |        |            |             |        |
|-----------|----|-----|-------------|-------------|--------|------------|-------------|--------|
| rs2853559 | GG | 315 | 104.64±9.90 | Ref         |        | 67.91±6.98 | Ref         |        |
|           | GA | 303 | 104.05±9.41 | -0.69(0.76) | 0.3656 | 67.65±6.32 | -0.33(0.51) | 0.5193 |
|           | AA | 86  | 105.62±10.8 | 0.56(1.15)  | 0.625  | 67.74±6.32 | -0.41(0.78) | 0.6029 |
| rs4334089 | GG | 225 | 104.88±11.0 | Ref         |        | 67.58±6.98 | Ref         |        |
|           | AG | 340 | 104.33±9.27 | -0.39(0.81) | 0.6324 | 68.10±6.50 | 0.66(0.55)  | 0.2269 |
|           | AA | 145 | 104.26±9.07 | -0.38(1.01) | 0.7083 | 67.23±6.23 | -0.20(0.68) | 0.7694 |
| rs7975232 | CC | 371 | 104.55±9.83 | Ref         |        | 67.57±6.63 | Ref         |        |
|           | CA | 281 | 103.86±9.85 | -0.83(0.75) | 0.2636 | 67.34±6.35 | -0.33(0.50) | 0.5144 |
|           | AA | 60  | 107.05±8.95 | 2.10(1.32)  | 0.1117 | 70.87±6.98 | 3.00(0.88)  | 0.0007 |

Abbreviations: VitD, vitamin D; SBP, systolic blood pressure; DBP, diastolic blood pressure.

Adjusted for pre-pregnancy BMI, maternal age, gestational weight gain, educational level, parity, basal blood pressure and the seasons of blood pressure measurement.

Table S8. The association of single SNP with SBP and DBP at T2.

| SNP       | Genotypes | N   | SBP, mmHg   |             |        | DBP, mmHg  |             |        |
|-----------|-----------|-----|-------------|-------------|--------|------------|-------------|--------|
|           |           |     | Mean ± SD   | β(se)       | P      | Mean ± SD  | β(se)       | P      |
| CYP24A1   |           |     |             |             |        |            |             |        |
| rs2209314 | TT        | 692 | 107.16±9.50 | Ref         |        | 69.74±8.06 | Ref         |        |
|           | CT        | 941 | 107.80±9.94 | 0.68(0.47)  | 0.1473 | 69.40±7.91 | -0.35(0.39) | 0.367  |
|           | CC        | 324 | 107.39±8.88 | 0.24(0.63)  | 0.7061 | 68.40±7.65 | -1.31(0.52) | 0.0116 |
| rs2248137 | GG        | 734 | 107.90±10.1 | Ref         |        | 68.25±8.04 | Ref         |        |
|           | GC        | 244 | 106.87±9.00 | -1.16(0.73) | 0.1124 | 71.19±6.97 | 2.17(0.59)  | 0.0003 |
|           | CC        | 440 | 107.25±9.24 | -0.41(0.57) | 0.477  | 68.96±7.91 | 0.73(0.46)  | 0.1133 |
| rs2762934 | GG        | 269 | 106.03±7.54 | Ref         |        | 71.97±6.15 | Ref         |        |
|           | GA        | 57  | 108.04±9.23 | 2.26(1.12)  | 0.0442 | 72.56±6.59 | 0.75(0.90)  | 0.4055 |
|           | AA        | 3   | 107.33±6.43 | 2.20(4.47)  | 0.6227 | 76.67±5.77 | 4.89(3.58)  | 0.1728 |
| rs6013897 | TT        | 251 | 106.65±7.85 | Ref         |        | 72.02±6.35 | Ref         |        |
|           | AT        | 62  | 106.44±7.54 | -0.07(1.10) | 0.9474 | 72.61±5.64 | 0.72(0.88)  | 0.4168 |
|           | AA        | 13  | 102.62±9.61 | -3.30(2.22) | 0.1373 | 72.15±7.50 | 0.74(1.77)  | 0.6771 |
| rs6127118 | GG        | 696 | 107.73±9.17 | Ref         |        | 69.14±7.68 | Ref         |        |

|                       |    |      |             |             |        |            |             |        |
|-----------------------|----|------|-------------|-------------|--------|------------|-------------|--------|
|                       | AG | 1207 | 107.43±9.94 | -0.40(0.45) | 0.3667 | 69.35±8.13 | 0.22(0.37)  | 0.5413 |
|                       | AA | 53   | 106.98±8.32 | -1.40(1.35) | 0.3008 | 73.25±5.58 | 2.65(1.11)  | 0.0167 |
| <b><i>CYP27B1</i></b> |    |      |             |             |        |            |             |        |
| rs10877012            | TT | 806  | 107.45±9.60 | Ref         |        | 69.14±8.10 | Ref         |        |
|                       | GT | 880  | 107.60±9.56 | 0.22(0.46)  | 0.6313 | 69.65±7.62 | 0.48(0.38)  | 0.201  |
|                       | GG | 265  | 107.38±9.97 | 0.06(0.67)  | 0.9307 | 69.19±8.41 | 0.18(0.55)  | 0.7431 |
| <b><i>CYP3A4</i></b>  |    |      |             |             |        |            |             |        |
| rs2242480             | CC | 1124 | 107.69±9.86 | Ref         |        | 69.61±8.00 | Ref         |        |
|                       | CT | 722  | 107.15±9.24 | -0.32(0.45) | 0.4775 | 69.03±7.89 | -0.43(0.37) | 0.2384 |
|                       | TT | 110  | 107.88±9.29 | 0.30(0.94)  | 0.7483 | 68.99±7.45 | -0.86(0.77) | 0.2623 |
| rs4646437             | GG | 243  | 106.33±7.99 | Ref         |        | 72.33±6.29 | Ref         |        |
|                       | AG | 80   | 106.90±7.61 | 0.40(1.00)  | 0.6886 | 71.88±5.99 | -0.50(0.79) | 0.5272 |
|                       | AA | 4    | 100.00±0.00 | -5.92(3.90) | 0.13   | 65.00±5.77 | -7.50(3.10) | 0.0161 |
| <b><i>GC</i></b>      |    |      |             |             |        |            |             |        |
| rs1155563             | TT | 712  | 107.66±9.64 | Ref         |        | 69.42±7.85 | Ref         |        |
|                       | TC | 901  | 107.46±9.54 | -0.30(0.47) | 0.529  | 69.37±7.98 | -0.19(0.39) | 0.6327 |
|                       | CC | 339  | 107.25±9.81 | -0.51(0.62) | 0.4074 | 69.28±8.04 | -0.18(0.51) | 0.7224 |

|            |    |     |             |             |        |            |             |        |
|------------|----|-----|-------------|-------------|--------|------------|-------------|--------|
| rs12512631 | TT | 212 | 106.44±8.24 | Ref         |        | 72.11±6.02 | Ref         |        |
|            | CT | 105 | 106.10±7.25 | -0.02(0.94) | 0.981  | 71.89±6.79 | -0.02(0.75) | 0.974  |
|            | CC | 8   | 108.00±5.13 | -0.15(2.81) | 0.9566 | 75.00±4.41 | 1.87(2.25)  | 0.4058 |
| rs16846876 | AA | 936 | 107.71±9.51 | Ref         |        | 69.51±7.89 | Ref         |        |
|            | AT | 812 | 107.24±9.63 | -0.51(0.45) | 0.2548 | 69.05±7.99 | -0.45(0.37) | 0.2191 |
|            | TT | 210 | 107.77±10.1 | -0.17(0.72) | 0.8084 | 70.02±8.00 | 0.51(0.59)  | 0.3899 |
| rs17467825 | AA | 925 | 107.83±9.57 | Ref         |        | 69.43±7.91 | Ref         |        |
|            | GA | 820 | 107.10±9.44 | -0.82(0.45) | 0.0667 | 69.19±7.91 | -0.26(0.37) | 0.4876 |
|            | GG | 215 | 107.74±10.4 | -0.38(0.71) | 0.5973 | 69.76±8.15 | 0.27(0.58)  | 0.6503 |
| rs2070741  | TT | 218 | 105.54±7.46 | Ref         |        | 72.00±6.20 | Ref         |        |
|            | GT | 101 | 107.77±8.22 | 2.13(0.95)  | 0.0256 | 72.22±6.26 | 0.36(0.77)  | 0.639  |
|            | GG | 10  | 111.00±9.94 | 5.10(2.48)  | 0.0405 | 73.50±6.92 | 0.92(2.00)  | 0.6475 |
| rs222020   | TT | 127 | 105.05±7.99 | Ref         |        | 71.93±6.27 | Ref         |        |
|            | CT | 147 | 106.67±7.95 | 1.29(0.93)  | 0.167  | 72.47±6.25 | 0.59(0.75)  | 0.4338 |
|            | CC | 54  | 108.67±6.83 | 3.65(1.25)  | 0.0037 | 71.63±6.19 | -0.01(1.01) | 0.9921 |
| rs2282679  | TT | 923 | 107.84±9.57 | Ref         |        | 69.42±7.94 | Ref         |        |
|            | GT | 815 | 107.14±9.48 | -0.78(0.45) | 0.0818 | 69.25±7.89 | -0.21(0.37) | 0.5632 |

|           |    |      |             |             |        |            |             |        |
|-----------|----|------|-------------|-------------|--------|------------|-------------|--------|
| rs2298849 | GG | 221  | 107.63±10.3 | -0.48(0.70) | 0.496  | 69.67±8.14 | 0.19(0.58)  | 0.7393 |
|           | AA | 808  | 106.96±9.82 | Ref         |        | 69.18±7.96 | Ref         |        |
|           | GA | 873  | 108.00±9.62 | 1.01(0.46)  | 0.0271 | 69.43±7.98 | 0.24(0.38)  | 0.5158 |
| rs2298850 | GG | 281  | 107.60±8.91 | 0.74(0.65)  | 0.256  | 69.79±7.79 | 0.66(0.53)  | 0.2138 |
|           | GG | 903  | 107.82±9.60 | Ref         |        | 69.49±7.88 | Ref         |        |
|           | CG | 822  | 107.12±9.45 | -0.77(0.45) | 0.0894 | 69.24±7.90 | -0.27(0.37) | 0.4731 |
| rs3755967 | CC | 221  | 107.61±10.4 | -0.47(0.70) | 0.509  | 69.67±8.14 | 0.13(0.58)  | 0.8162 |
|           | CC | 920  | 107.83±9.57 | Ref         |        | 69.43±7.94 | Ref         |        |
|           | CT | 821  | 107.14±9.46 | -0.77(0.45) | 0.0858 | 69.23±7.88 | -0.22(0.37) | 0.5439 |
| rs4588    | TT | 221  | 107.63±10.3 | -0.48(0.70) | 0.4982 | 69.67±8.14 | 0.19(0.58)  | 0.7376 |
|           | GG | 912  | 107.82±9.57 | Ref         |        | 69.42±7.93 | Ref         |        |
|           | GT | 821  | 107.14±9.46 | -0.74(0.45) | 0.0988 | 69.27±7.91 | -0.18(0.37) | 0.6232 |
| rs7041    | TT | 222  | 107.59±10.3 | -0.50(0.70) | 0.4725 | 69.58±8.12 | 0.10(0.58)  | 0.8584 |
|           | AA | 1051 | 107.78±9.91 | Ref         |        | 69.54±7.83 | Ref         |        |
|           | CA | 769  | 107.26±9.36 | -0.32(0.45) | 0.4781 | 69.27±8.08 | -0.25(0.37) | 0.4904 |
|           | CC | 140  | 106.66±8.65 | -0.92(0.84) | 0.2736 | 68.56±7.84 | -0.84(0.69) | 0.2233 |

***LRP2***

|            |    |     |             |             |        |            |             |        |
|------------|----|-----|-------------|-------------|--------|------------|-------------|--------|
| rs10210408 | CC | 648 | 107.58±9.33 | Ref         |        | 69.48±7.51 | Ref         |        |
|            | TC | 957 | 107.37±9.81 | -0.21(0.48) | 0.6529 | 69.26±8.14 | -0.16(0.39) | 0.6752 |
|            | TT | 357 | 107.85±9.62 | 0.27(0.62)  | 0.6657 | 69.47±8.17 | -0.09(0.51) | 0.8639 |
| rs2228171  | TT | 668 | 107.17±9.30 | Ref         |        | 69.41±7.62 | Ref         |        |
|            | CT | 185 | 106.23±8.83 | -0.96(0.75) | 0.2012 | 71.61±6.63 | 1.43(0.62)  | 0.0212 |
|            | CC | 215 | 106.80±9.09 | -0.27(0.70) | 0.7044 | 70.73±7.90 | 0.89(0.58)  | 0.125  |
| rs2389557  | AA | 93  | 106.75±7.16 | Ref         |        | 71.43±6.28 | Ref         |        |
|            | GA | 165 | 106.05±8.41 | -0.50(1.01) | 0.6208 | 72.37±6.39 | 0.86(0.80)  | 0.2835 |
|            | GG | 68  | 106.81±7.54 | 0.20(1.24)  | 0.8701 | 72.53±5.87 | 1.01(0.99)  | 0.3098 |
| rs2544381  | GG | 184 | 106.46±8.18 | Ref         |        | 72.03±6.32 | Ref         |        |
|            | CG | 121 | 106.40±7.65 | 0.38(0.91)  | 0.6798 | 71.89±5.96 | -0.05(0.73) | 0.94   |
|            | CC | 23  | 105.48±6.67 | -1.42(1.72) | 0.4103 | 74.09±6.89 | 1.51(1.37)  | 0.2728 |
| rs2544390  | CC | 97  | 106.76±7.44 | Ref         |        | 71.57±5.95 | Ref         |        |
|            | CT | 159 | 106.18±8.17 | -0.32(1.00) | 0.7521 | 72.25±6.25 | 0.74(0.80)  | 0.3523 |
|            | TT | 71  | 106.37±7.88 | -0.12(1.21) | 0.9194 | 72.63±6.64 | 0.99(0.97)  | 0.3059 |
| rs4667591  | TT | 99  | 106.34±7.25 | Ref         |        | 72.23±6.31 | Ref         |        |
|            | GT | 163 | 105.84±8.12 | -0.50(1.00) | 0.6172 | 71.71±6.42 | -0.61(0.80) | 0.4467 |

|            |    |     |             |             |        |            |             |        |
|------------|----|-----|-------------|-------------|--------|------------|-------------|--------|
| rs7600336  | GG | 65  | 107.85±8.10 | 1.51(1.26)  | 0.2312 | 73.02±5.66 | 1.00(1.01)  | 0.3222 |
|            | CC | 106 | 105.68±6.97 | Ref         |        | 71.92±6.21 | Ref         |        |
|            | TC | 149 | 106.64±8.41 | 0.96(1.00)  | 0.3355 | 72.29±6.41 | 0.51(0.80)  | 0.5232 |
|            | TT | 74  | 106.89±7.98 | 1.32(1.18)  | 0.2652 | 72.05±5.97 | 0.36(0.94)  | 0.7005 |
| <b>VDR</b> |    |     |             |             |        |            |             |        |
| rs10783219 | AA | 728 | 107.44±9.70 | Ref         |        | 69.38±7.83 | Ref         |        |
|            | TA | 942 | 107.92±9.66 | 0.33(0.46)  | 0.4695 | 69.27±8.02 | -0.14(0.38) | 0.713  |
|            | TT | 291 | 106.43±9.24 | -0.91(0.65) | 0.1623 | 69.75±7.91 | 0.40(0.54)  | 0.4541 |
| rs11568820 | CC | 84  | 105.89±7.03 | Ref         |        | 71.81±6.36 | Ref         |        |
|            | TC | 168 | 105.92±8.24 | 0.15(1.04)  | 0.8836 | 72.24±6.42 | 0.54(0.83)  | 0.5187 |
|            | TT | 74  | 107.88±7.76 | 1.59(1.24)  | 0.2003 | 72.12±5.73 | 0.33(0.99)  | 0.7406 |
| rs2228570  | GG | 88  | 107.20±8.44 | Ref         |        | 72.36±6.01 | Ref         |        |
|            | GA | 180 | 106.13±7.78 | -1.17(1.01) | 0.2457 | 72.12±6.35 | -0.47(0.81) | 0.5616 |
|            | AA | 60  | 105.87±7.31 | -0.72(1.31) | 0.5796 | 71.77±6.30 | -0.59(1.04) | 0.5754 |
| rs2238136  | CC | 225 | 106.36±8.03 | Ref         |        | 72.23±6.14 | Ref         |        |
|            | TC | 94  | 106.27±7.37 | 0.44(0.97)  | 0.6516 | 71.56±6.40 | -0.34(0.77) | 0.6588 |
|            | TT | 9   | 107.78±9.72 | 1.08(2.65)  | 0.6835 | 75.33±6.48 | 2.46(2.11)  | 0.2451 |



|           |    |     |             |             |        |            |             |        |
|-----------|----|-----|-------------|-------------|--------|------------|-------------|--------|
| rs2853559 | GG | 145 | 106.19±8.16 | Ref         |        | 72.49±6.58 | Ref         |        |
|           | GA | 142 | 106.60±7.84 | 0.26(0.92)  | 0.774  | 71.93±6.14 | -0.55(0.73) | 0.4562 |
|           | AA | 37  | 106.11±6.91 | -0.73(1.44) | 0.6138 | 71.11±5.21 | -1.46(1.15) | 0.2063 |
| rs4334089 | GG | 93  | 105.57±7.13 | Ref         |        | 71.51±6.64 | Ref         | —      |
|           | AG | 162 | 106.19±8.24 | 1.00(1.02)  | 0.3239 | 72.33±6.45 | 1.00(0.81)  | 0.2212 |
|           | AA | 74  | 107.85±7.82 | 1.87(1.21)  | 0.1232 | 72.42±5.15 | 0.91(0.97)  | 0.3464 |
| rs7975232 | CC | 167 | 106.71±7.50 | Ref         |        | 72.57±6.22 | Ref         |        |
|           | CA | 129 | 105.94±8.31 | -0.97(0.91) | 0.2883 | 71.31±5.99 | -1.28(0.72) | 0.0756 |
|           | AA | 33  | 106.55±8.05 | -0.54(1.48) | 0.7138 | 72.97±7.00 | 0.50(1.17)  | 0.668  |

Abbreviations: VitD, vitamin D; SBP, systolic blood pressure; DBP, diastolic blood pressure.

Adjusted for pre-pregnancy BMI, maternal age, gestational weight gain, educational level, parity, basal blood pressure and the seasons of blood pressure measurement.

Table S9. The association of single SNP with SBP and DBP at T3.

| SNP       | Genotypes | N   | SBP, mmHg   |             |        | DBP, mmHg  |             |        |
|-----------|-----------|-----|-------------|-------------|--------|------------|-------------|--------|
|           |           |     | Mean ± SD   | β(se)       | P      | Mean ± SD  | β(se)       | P      |
| CYP24A1   |           |     |             |             |        |            |             |        |
| rs2209314 | TT        | 439 | 109.39±10.0 | Ref         |        | 71.36±8.01 | Ref         |        |
|           | CT        | 614 | 109.32±10.5 | -0.03(0.62) | 0.965  | 71.09±7.59 | -0.31(0.47) | 0.5074 |
|           | CC        | 203 | 108.55±9.63 | -0.48(0.84) | 0.5669 | 70.73±7.78 | -0.43(0.64) | 0.5027 |
| rs2248137 | GG        | 470 | 109.72±10.6 | Ref         |        | 70.38±7.93 | Ref         |        |
|           | GC        | 169 | 108.74±9.11 | -1.00(0.90) | 0.2676 | 72.78±6.56 | 1.71(0.70)  | 0.0141 |
|           | CC        | 285 | 108.71±9.94 | -1.05(0.74) | 0.1561 | 70.51±8.18 | 0.04(0.57)  | 0.9436 |
| rs2762934 | GG        | 185 | 107.76±8.69 | Ref         |        | 72.68±6.28 | Ref         |        |
|           | GA        | 43  | 106.33±7.94 | -1.36(1.44) | 0.3484 | 71.44±5.91 | -1.05(1.06) | 0.3226 |
|           | AA        | 4   | 113.50±4.73 | 5.89(4.38)  | 0.1796 | 76.00±7.12 | 4.18(3.20)  | 0.1926 |
| rs6013897 | TT        | 171 | 107.62±8.47 | Ref         |        | 72.74±6.16 | Ref         |        |
|           | AT        | 50  | 107.76±9.22 | 0.59(1.42)  | 0.6761 | 71.84±6.50 | -1.15(1.03) | 0.2638 |
|           | AA        | 11  | 108.18±7.51 | 0.15(2.72)  | 0.9575 | 71.64±6.19 | -0.98(1.97) | 0.6192 |
| rs6127118 | GG        | 449 | 108.93±9.54 | Ref         |        | 71.11±7.67 | Ref         |        |

|                       |    |     |             |             |        |            |             |        |
|-----------------------|----|-----|-------------|-------------|--------|------------|-------------|--------|
|                       | AG | 760 | 109.54±10.6 | 0.29(0.59)  | 0.6217 | 71.04±7.90 | -0.20(0.45) | 0.6556 |
|                       | AA | 48  | 107.08±9.02 | -2.36(1.52) | 0.1199 | 72.56±6.11 | 0.53(1.15)  | 0.6482 |
| <b><i>CYP27B1</i></b> |    |     |             |             |        |            |             |        |
| rs10877012            | TT | 499 | 109.38±10.1 | Ref         |        | 71.20±7.94 | Ref         |        |
|                       | GT | 585 | 109.06±10.3 | -0.41(0.61) | 0.5019 | 70.79±7.70 | -0.52(0.46) | 0.2562 |
|                       | GG | 169 | 109.03±10.3 | -0.30(0.89) | 0.7382 | 71.97±7.33 | 0.82(0.67)  | 0.2192 |
| <b><i>CYP3A4</i></b>  |    |     |             |             |        |            |             |        |
| rs2242480             | CC | 751 | 109.58±10.3 | Ref         |        | 71.22±7.81 | Ref         |        |
|                       | CT | 435 | 108.66±9.78 | -0.76(0.60) | 0.2068 | 70.81±7.63 | -0.15(0.46) | 0.7379 |
|                       | TT | 69  | 108.87±11.3 | -0.75(1.25) | 0.5477 | 72.07±7.95 | 0.63(0.95)  | 0.5055 |
| rs4646437             | GG | 176 | 107.32±8.77 | Ref         |        | 72.40±6.49 | Ref         |        |
|                       | AG | 54  | 108.74±7.97 | 1.20(1.34)  | 0.3706 | 72.87±5.39 | 0.38(0.98)  | 0.6944 |
|                       | AA | 2   | 105.00±7.07 | -1.47(6.11) | 0.8106 | 75.00±7.07 | 1.95(4.45)  | 0.6616 |
| <b><i>GC</i></b>      |    |     |             |             |        |            |             |        |
| rs1155563             | TT | 449 | 109.39±10.4 | Ref         |        | 71.42±7.74 | Ref         |        |
|                       | TC | 591 | 108.80±10.1 | -0.50(0.62) | 0.4255 | 70.83±7.78 | -0.63(0.47) | 0.1863 |
|                       | CC | 216 | 109.94±10.1 | 0.57(0.82)  | 0.4909 | 71.34±7.73 | 0.02(0.63)  | 0.9691 |

|            |    |     |             |             |        |            |             |        |
|------------|----|-----|-------------|-------------|--------|------------|-------------|--------|
| rs12512631 | TT | 143 | 108.70±8.68 | Ref         |        | 72.69±6.12 | Ref         |        |
|            | CT | 80  | 105.59±8.17 | -3.11(1.18) | 0.0091 | 72.16±6.61 | -0.46(0.87) | 0.5988 |
|            | CC | 8   | 107.50±7.07 | -1.85(3.12) | 0.5532 | 72.50±4.63 | -1.03(2.31) | 0.6545 |
| rs16846876 | AA | 587 | 109.45±10.6 | Ref         |        | 71.40±7.85 | Ref         |        |
|            | AT | 535 | 108.55±9.49 | -1.04(0.60) | 0.0806 | 70.59±7.72 | -0.86(0.45) | 0.0588 |
|            | TT | 136 | 110.94±10.8 | 1.11(0.95)  | 0.2417 | 72.04±7.38 | 0.71(0.72)  | 0.3212 |
| rs17467825 | AA | 582 | 109.56±10.5 | Ref         |        | 71.19±7.83 | Ref         |        |
|            | GA | 528 | 108.42±9.66 | -1.31(0.60) | 0.0292 | 70.65±7.70 | -0.61(0.45) | 0.1788 |
|            | GG | 150 | 110.53±10.6 | 0.61(0.91)  | 0.4987 | 72.45±7.53 | 1.13(0.69)  | 0.1008 |
| rs2070741  | TT | 150 | 107.25±8.31 | Ref         |        | 72.89±6.29 | Ref         |        |
|            | GT | 74  | 108.16±9.06 | 1.67(1.23)  | 0.1774 | 71.62±6.23 | -0.73(0.90) | 0.4184 |
|            | GG | 8   | 108.75±8.35 | 2.42(3.13)  | 0.44   | 73.50±4.87 | 1.00(2.29)  | 0.6625 |
| rs222020   | TT | 79  | 107.97±8.85 | Ref         |        | 73.24±6.44 | Ref         |        |
|            | CT | 105 | 107.73±8.17 | 0.13(1.29)  | 0.9188 | 72.42±5.95 | -0.59(0.94) | 0.5308 |
|            | CC | 47  | 106.57±8.98 | -0.99(1.63) | 0.544  | 71.53±6.53 | -1.34(1.19) | 0.2614 |
| rs2282679  | TT | 582 | 109.58±10.5 | Ref         |        | 71.17±7.81 | Ref         |        |
|            | GT | 524 | 108.42±9.65 | -1.28(0.60) | 0.0325 | 70.67±7.71 | -0.56(0.45) | 0.2214 |

|           |    |     |             |             |        |            |             |        |
|-----------|----|-----|-------------|-------------|--------|------------|-------------|--------|
| rs2298849 | GG | 152 | 110.61±10.7 | 0.71(0.90)  | 0.4296 | 72.52±7.55 | 1.27(0.69)  | 0.065  |
|           | AA | 519 | 109.79±10.5 | Ref         |        | 71.29±7.80 | Ref         |        |
|           | GA | 564 | 108.79±9.86 | -0.93(0.60) | 0.1219 | 70.85±7.82 | -0.49(0.46) | 0.2907 |
| rs2298850 | GG | 178 | 108.76±10.4 | -0.87(0.87) | 0.3156 | 71.41±7.42 | 0.19(0.66)  | 0.7743 |
|           | GG | 566 | 109.62±10.5 | Ref         |        | 71.23±7.74 | Ref         |        |
|           | CG | 532 | 108.36±9.63 | -1.39(0.60) | 0.0208 | 70.60±7.82 | -0.69(0.46) | 0.1328 |
| rs3755967 | CC | 152 | 110.61±10.7 | 0.68(0.90)  | 0.4526 | 72.52±7.55 | 1.21(0.69)  | 0.0794 |
|           | CC | 580 | 109.63±10.5 | Ref         |        | 71.17±7.82 | Ref         |        |
|           | CT | 529 | 108.36±9.63 | -1.41(0.60) | 0.019  | 70.65±7.69 | -0.58(0.45) | 0.2002 |
| rs4588    | TT | 152 | 110.61±10.7 | 0.66(0.90)  | 0.4667 | 72.52±7.55 | 1.26(0.69)  | 0.0653 |
|           | GG | 571 | 109.64±10.5 | Ref         |        | 71.24±7.74 | Ref         |        |
|           | GT | 531 | 108.39±9.61 | -1.37(0.60) | 0.0229 | 70.63±7.78 | -0.64(0.46) | 0.1593 |
| rs7041    | TT | 153 | 110.65±10.6 | 0.67(0.90)  | 0.455  | 72.39±7.69 | 1.07(0.69)  | 0.1192 |
|           | AA | 680 | 109.33±10.1 | Ref         |        | 70.87±7.78 | Ref         |        |
|           | CA | 495 | 108.94±10.4 | -0.23(0.59) | 0.6973 | 71.35±7.84 | 0.45(0.45)  | 0.3092 |
|           | CC | 84  | 110.19±9.52 | 1.13(1.15)  | 0.3252 | 71.90±7.03 | 1.13(0.87)  | 0.1943 |

***LRP2***

|            |    |     |             |             |        |            |             |        |
|------------|----|-----|-------------|-------------|--------|------------|-------------|--------|
| rs10210408 | CC | 414 | 109.29±10.3 | Ref         |        | 71.26±7.58 | Ref         |        |
|            | TC | 629 | 109.03±10.0 | -0.35(0.63) | 0.5806 | 70.79±7.84 | -0.33(0.48) | 0.4964 |
|            | TT | 218 | 109.60±10.4 | 0.40(0.83)  | 0.6336 | 71.77±7.81 | 0.53(0.63)  | 0.4028 |
| rs2228171  | TT | 432 | 109.55±10.5 | Ref         |        | 71.03±7.72 | Ref         |        |
|            | CT | 123 | 108.11±8.51 | -1.68(1.05) | 0.1103 | 72.10±6.77 | 0.55(0.76)  | 0.4685 |
|            | CC | 133 | 108.11±10.7 | -1.17(1.01) | 0.249  | 72.25±7.40 | 1.15(0.74)  | 0.1192 |
| rs2389557  | AA | 73  | 107.48±8.39 | Ref         |        | 72.37±6.58 | Ref         |        |
|            | GA | 114 | 107.43±8.52 | 0.19(1.30)  | 0.8843 | 72.39±5.98 | 0.35(0.94)  | 0.7113 |
|            | GG | 44  | 108.59±9.14 | 1.01(1.64)  | 0.5379 | 73.00±6.39 | 0.57(1.19)  | 0.6308 |
| rs2544381  | GG | 140 | 107.02±8.08 | Ref         |        | 72.42±6.48 | Ref         |        |
|            | CG | 75  | 108.99±9.29 | 2.42(1.23)  | 0.0501 | 72.84±6.06 | 0.72(0.91)  | 0.4249 |
|            | CC | 16  | 105.88±8.66 | -0.27(2.28) | 0.905  | 71.88±5.14 | -0.55(1.68) | 0.7416 |
| rs2544390  | CC | 75  | 106.31±8.25 | Ref         |        | 71.32±6.62 | Ref         |        |
|            | CT | 107 | 108.69±8.50 | 2.47(1.28)  | 0.0551 | 72.85±6.08 | 1.52(0.93)  | 0.1041 |
|            | TT | 49  | 107.10±8.95 | 1.27(1.57)  | 0.4186 | 73.63±5.81 | 2.62(1.14)  | 0.0227 |
| rs4667591  | TT | 70  | 108.49±8.32 | Ref         |        | 71.77±5.06 | Ref         |        |
|            | GT | 117 | 107.68±8.80 | -0.85(1.33) | 0.5259 | 72.39±6.63 | 0.60(0.96)  | 0.5339 |

|                   |    |     |             |             |        |            |             |        |
|-------------------|----|-----|-------------|-------------|--------|------------|-------------|--------|
| rs7600336         | GG | 45  | 106.18±8.35 | -1.70(1.66) | 0.3067 | 74.09±6.70 | 2.40(1.20)  | 0.0472 |
|                   | CC | 81  | 107.46±8.52 | Ref         |        | 71.62±5.90 | Ref         |        |
|                   | TC | 94  | 108.59±8.64 | 0.58(1.31)  | 0.6591 | 73.22±6.47 | 1.48(0.96)  | 0.1241 |
|                   | TT | 57  | 106.14±8.31 | -1.60(1.47) | 0.2801 | 72.60±6.26 | 1.08(1.08)  | 0.3184 |
| <b><i>VDR</i></b> |    |     |             |             |        |            |             |        |
| rs10783219        | AA | 481 | 109.19±10.4 | Ref         |        | 70.93±8.02 | Ref         |        |
|                   | TA | 591 | 109.19±10.2 | 0.04(0.61)  | 0.9509 | 71.32±7.81 | 0.41(0.46)  | 0.3814 |
|                   | TT | 185 | 109.37±9.78 | 0.32(0.86)  | 0.7104 | 71.02±6.91 | 0.16(0.65)  | 0.8057 |
| rs11568820        | CC | 56  | 108.04±9.42 | Ref         |        | 72.64±5.52 | Ref         |        |
|                   | TC | 123 | 107.92±8.19 | -0.32(1.37) | 0.8146 | 72.58±6.21 | 0.11(1.01)  | 0.9168 |
|                   | TT | 51  | 105.82±8.07 | -2.56(1.64) | 0.1214 | 72.10±7.10 | -0.96(1.21) | 0.4307 |
| rs2228570         | GG | 57  | 107.53±8.15 | Ref         |        | 72.11±6.33 | Ref         |        |
|                   | GA | 130 | 107.20±8.20 | -0.51(1.38) | 0.7099 | 73.08±6.39 | 1.43(1.00)  | 0.1547 |
|                   | AA | 44  | 108.77±10.0 | 1.10(1.76)  | 0.5347 | 71.41±5.60 | -0.66(1.28) | 0.6066 |
| rs2238136         | CC | 160 | 107.63±8.71 | Ref         |        | 72.74±6.49 | Ref         |        |
|                   | TC | 64  | 107.25±8.15 | -0.33(1.27) | 0.7937 | 71.94±5.77 | -0.66(0.92) | 0.4765 |
|                   | TT | 8   | 110.75±9.50 | 3.49(3.13)  | 0.2664 | 73.25±4.65 | 0.17(2.28)  | 0.9405 |

|           |    |     |             |             |        |            |             |        |
|-----------|----|-----|-------------|-------------|--------|------------|-------------|--------|
| rs2853559 | GG | 113 | 107.66±8.47 | Ref         |        | 72.48±6.61 | Ref         |        |
|           | GA | 92  | 107.18±9.00 | -0.41(1.22) | 0.7386 | 72.54±6.21 | -0.20(0.89) | 0.8211 |
|           | AA | 24  | 108.08±7.31 | -0.13(1.93) | 0.946  | 72.42±4.72 | -0.19(1.41) | 0.8945 |
| rs4334089 | GG | 63  | 108.13±9.28 | Ref         |        | 72.43±5.51 | Ref         |        |
|           | AG | 120 | 107.68±7.84 | -0.81(1.34) | 0.5476 | 72.57±6.15 | 0.20(0.98)  | 0.8391 |
|           | AA | 49  | 106.67±9.25 | -2.32(1.64) | 0.1592 | 72.47±7.35 | -0.57(1.20) | 0.6355 |
| rs7975232 | CC | 123 | 107.65±8.66 | Ref         |        | 72.52±6.05 | Ref         |        |
|           | CA | 87  | 107.31±8.41 | -0.79(1.21) | 0.5111 | 72.05±6.55 | -0.70(0.88) | 0.4256 |
|           | AA | 23  | 108.87±8.76 | 0.98(1.98)  | 0.6223 | 74.35±5.80 | 1.58(1.44)  | 0.2725 |

Abbreviations: VitD, vitamin D; SBP, systolic blood pressure; DBP, diastolic blood pressure.

Adjusted for pre-pregnancy BMI, maternal age, gestational weight gain, educational level, parity, basal blood pressure and the seasons of blood pressure measurement.



Table S10. The association of single SNP and VitD at T1 with blood pressure at T1.

| SNP            | Genotypes    | VitD<br>deficiency | N   | SBP, mmHg   |             |          | DBP, mmHg  |             |          |
|----------------|--------------|--------------------|-----|-------------|-------------|----------|------------|-------------|----------|
|                |              |                    |     | Mean ± SD   | β(se)       | <i>P</i> | Mean ± SD  | β(se)       | <i>P</i> |
| <i>CYP24A1</i> |              |                    |     |             |             |          |            |             |          |
| rs2762934      | GG           | No                 | 125 | 104.44±8.93 | Ref         |          | 66.95±5.67 | Ref         |          |
|                | GA           | No                 | 23  | 103.91±8.97 | -0.64(1.95) | 0.7447   | 67.70±6.60 | 0.72(1.45)  | 0.6178   |
|                | AA           | No                 | 3   | 115.00±18.0 | 7.58(5.01)  | 0.1306   | 74.33±9.29 | 8.47(3.71)  | 0.0227   |
|                | GG           | Yes                | 461 | 104.30±9.39 | -1.27(0.88) | 0.1497   | 68.15±6.60 | 1.02(0.65)  | 0.1175   |
|                | GA           | Yes                | 94  | 105.32±12.6 | -0.56(1.19) | 0.6359   | 66.63±7.55 | -0.70(0.88) | 0.4270   |
|                | AA           | Yes                | 4   | 103.50±5.51 | 0.12(4.36)  | 0.9787   | 69.50±4.20 | 3.35(3.23)  | 0.2995   |
|                | <i>P</i> 交互项 |                    |     |             |             | 0.8672   |            |             | 0.0150   |

Abbreviations: VitD, vitamin D; SBP, systolic blood pressure; DBP, diastolic blood pressure.

Adjusted for pre-pregnancy BMI, maternal age, gestational weight gain, educational level, parity, basal blood pressure and the seasons of blood pressure measurement.

Table S11. The association of single SNP and VitD at T2 with blood pressure at T2.

| SNP        | Genotypes | VitD<br>deficiency | N   | SBP, mmHg   |             |        | DBP, mmHg  |             |        |
|------------|-----------|--------------------|-----|-------------|-------------|--------|------------|-------------|--------|
|            |           |                    |     | Mean ± SD   | β(se)       | P      | Mean ± SD  | β(se)       | P      |
| GC         |           |                    |     |             |             |        |            |             |        |
| rs16846876 | AA        | No                 | 557 | 107.92±9.77 | Ref         |        | 69.34±8.05 | Ref         |        |
|            | AT        | No                 | 450 | 107.41±9.64 | -0.62(0.60) | 0.2954 | 68.41±8.25 | -0.93(0.49) | 0.0565 |
|            | TT        | No                 | 102 | 107.61±10.6 | -0.66(1.01) | 0.5140 | 68.18±8.23 | -1.14(0.83) | 0.1703 |
|            | AA        | Yes                | 379 | 107.42±9.13 | -0.74(0.63) | 0.2397 | 69.75±7.64 | 0.25(0.52)  | 0.6256 |
|            | AT        | Yes                | 362 | 107.04±9.63 | -1.05(0.64) | 0.1000 | 69.83±7.58 | 0.37(0.52)  | 0.4832 |
|            | TT        | Yes                | 108 | 107.93±9.64 | -0.29(0.99) | 0.7685 | 71.76±7.39 | 2.23(0.81)  | 0.0059 |
|            | P 交互项     |                    |     |             |             | 0.4180 |            |             | 0.0056 |
| rs17467825 | AA        | No                 | 578 | 107.96±9.83 | Ref         |        | 69.25±8.00 | Ref         |        |
|            | GA        | No                 | 437 | 107.32±9.58 | -0.60(0.59) | 0.3020 | 68.45±8.28 | -0.77(0.49) | 0.1124 |
|            | GG        | No                 | 94  | 107.65±10.5 | -0.49(1.03) | 0.6368 | 68.21±8.44 | -1.21(0.86) | 0.1566 |
|            | AA        | Yes                | 347 | 107.61±9.13 | -0.29(0.63) | 0.6496 | 69.71±7.77 | 0.33(0.53)  | 0.5284 |
|            | GA        | Yes                | 383 | 106.85±9.28 | -1.15(0.61) | 0.0613 | 70.04±7.39 | 0.60(0.51)  | 0.2434 |
|            | GG        | Yes                | 121 | 107.81±10.4 | -0.36(0.93) | 0.6979 | 70.97±7.74 | 1.63(0.77)  | 0.0351 |

|           |              |     |     |             |             |        |            |             |        |
|-----------|--------------|-----|-----|-------------|-------------|--------|------------|-------------|--------|
|           | <i>P</i> 交互项 |     |     |             |             | 0.8104 |            |             | 0.0189 |
| rs2282679 | TT           | No  | 578 | 107.95±9.80 | Ref         |        | 69.26±8.02 | Ref         |        |
|           | GT           | No  | 434 | 107.37±9.64 | -0.55(0.59) | 0.3526 | 68.49±8.27 | -0.76(0.49) | 0.1180 |
|           | GG           | No  | 98  | 107.40±10.4 | -0.71(1.01) | 0.4838 | 68.14±8.35 | -1.28(0.84) | 0.1291 |
|           | TT           | Yes | 345 | 107.65±9.17 | -0.24(0.63) | 0.7038 | 69.70±7.80 | 0.29(0.53)  | 0.5818 |
|           | GT           | Yes | 381 | 106.87±9.30 | -1.11(0.62) | 0.0710 | 70.11±7.34 | 0.64(0.51)  | 0.2081 |
|           | GG           | Yes | 123 | 107.81±10.3 | -0.30(0.92) | 0.7411 | 70.88±7.80 | 1.55(0.77)  | 0.0429 |
|           | <i>P</i> 交互项 |     |     |             |             | 0.7543 |            |             | 0.0161 |
| rs2298849 | AA           | No  | 430 | 107.10±10.1 | Ref         |        | 68.40±8.38 | Ref         |        |
|           | GA           | No  | 511 | 108.20±9.76 | 1.17(0.61)  | 0.0575 | 69.04±7.95 | 0.67(0.50)  | 0.1752 |
|           | GG           | No  | 170 | 107.59±8.99 | 0.59(0.85)  | 0.4894 | 69.59±8.24 | 1.71(0.69)  | 0.0129 |
|           | AA           | Yes | 378 | 106.80±9.52 | -0.34(0.67) | 0.6110 | 70.07±7.37 | 1.83(0.54)  | 0.0007 |
|           | GA           | Yes | 362 | 107.72±9.42 | 0.41(0.68)  | 0.5481 | 69.98±7.99 | 1.66(0.55)  | 0.0024 |
|           | GG           | Yes | 111 | 107.62±8.84 | 0.56(1.00)  | 0.5730 | 70.10±7.08 | 1.39(0.81)  | 0.0859 |
|           | <i>P</i> 交互项 |     |     |             |             | 0.9384 |            |             | 0.0408 |
| rs2298850 | GG           | No  | 564 | 107.93±9.87 | Ref         |        | 69.27±7.97 | Ref         |        |
|           | CG           | No  | 437 | 107.46±9.59 | -0.39(0.59) | 0.5120 | 68.57±8.31 | -0.67(0.49) | 0.1729 |

|           |              |     |     |             |             |        |            |             |        |
|-----------|--------------|-----|-----|-------------|-------------|--------|------------|-------------|--------|
| rs3755967 | CC           | No  | 99  | 107.32±10.4 | -0.73(1.01) | 0.4716 | 68.16±8.31 | -1.26(0.84) | 0.1324 |
|           | GG           | Yes | 339 | 107.64±9.13 | -0.20(0.64) | 0.7597 | 69.85±7.72 | 0.43(0.53)  | 0.4137 |
|           | CG           | Yes | 385 | 106.73±9.28 | -1.17(0.62) | 0.0586 | 69.99±7.36 | 0.54(0.51)  | 0.2942 |
|           | CC           | Yes | 122 | 107.84±10.4 | -0.21(0.93) | 0.8193 | 70.89±7.83 | 1.55(0.77)  | 0.0434 |
|           | <i>P</i> 交互项 |     |     |             |             | 0.8360 |            |             | 0.0361 |
|           | CC           | No  | 575 | 107.95±9.81 | Ref         |        | 69.26±8.03 | Ref         |        |
|           | CT           | No  | 438 | 107.39±9.62 | -0.50(0.59) | 0.3894 | 68.49±8.25 | -0.75(0.49) | 0.1234 |
|           | TT           | No  | 98  | 107.40±10.4 | -0.70(1.01) | 0.4892 | 68.14±8.35 | -1.27(0.84) | 0.1297 |
|           | CC           | Yes | 345 | 107.65±9.17 | -0.23(0.63) | 0.7132 | 69.70±7.80 | 0.29(0.53)  | 0.5802 |
|           | CT           | Yes | 383 | 106.86±9.28 | -1.12(0.61) | 0.0697 | 70.07±7.34 | 0.61(0.51)  | 0.2318 |
| rs4588    | TT           | Yes | 123 | 107.81±10.3 | -0.30(0.92) | 0.7468 | 70.88±7.80 | 1.55(0.77)  | 0.0426 |
|           | <i>P</i> 交互项 |     |     |             |             | 0.7820 |            |             | 0.0173 |
|           | GG           | No  | 571 | 107.91±9.83 | Ref         |        | 69.20±8.02 | Ref         |        |
|           | GT           | No  | 439 | 107.42±9.60 | -0.43(0.59) | 0.4582 | 68.61±8.32 | -0.60(0.49) | 0.2202 |
|           | TT           | No  | 98  | 107.40±10.4 | -0.68(1.01) | 0.5019 | 68.04±8.26 | -1.35(0.84) | 0.1098 |
|           | GG           | Yes | 341 | 107.67±9.14 | -0.19(0.64) | 0.7656 | 69.78±7.79 | 0.41(0.53)  | 0.4380 |
|           | GT           | Yes | 382 | 106.82±9.30 | -1.09(0.62) | 0.0770 | 70.02±7.34 | 0.63(0.51)  | 0.2221 |

|            |              |     |     |             |             |        |            |             |        |
|------------|--------------|-----|-----|-------------|-------------|--------|------------|-------------|--------|
|            | TT           | Yes | 124 | 107.75±10.3 | -0.32(0.92) | 0.7262 | 70.79±7.83 | 1.52(0.76)  | 0.0472 |
|            | <i>P</i> 交互项 |     |     |             |             | 0.8569 |            |             | 0.0323 |
| <b>VDR</b> |              |     |     |             |             |        |            |             |        |
| rs2228570  | GG           | No  | 40  | 104.25±7.70 | Ref         |        | 71.75±6.99 | Ref         |        |
|            | GA           | No  | 74  | 107.00±8.37 | 2.73(1.50)  | 0.0702 | 72.23±6.79 | 0.45(1.23)  | 0.7158 |
|            | AA           | No  | 23  | 105.04±6.09 | 1.56(2.01)  | 0.4384 | 71.39±6.59 | 0.32(1.64)  | 0.8455 |
|            | GG           | Yes | 48  | 109.67±8.31 | 5.95(1.65)  | 0.0003 | 72.88±5.07 | 0.99(1.34)  | 0.4627 |
|            | GA           | Yes | 106 | 105.53±7.32 | 1.64(1.45)  | 0.2568 | 72.05±6.06 | -0.20(1.18) | 0.8656 |
|            | AA           | Yes | 37  | 106.38±8.01 | 3.18(1.78)  | 0.0753 | 72.00±6.20 | -0.30(1.45) | 0.8391 |
|            | <i>P</i> 交互项 |     |     |             |             | 0.0434 |            |             | 0.4043 |
| rs2238136  | CC           | No  | 99  | 105.86±8.19 | Ref         |        | 72.58±6.68 | Ref         |        |
|            | TC           | No  | 37  | 106.05±7.17 | 0.75(1.51)  | 0.6182 | 70.05±6.74 | -2.27(1.19) | 0.0576 |
|            | TT           | No  | 1   | —           | —           | —      | —          | —           | —      |
|            | CC           | Yes | 126 | 106.75±7.92 | 1.51(1.12)  | 0.1764 | 71.95±5.70 | -1.19(0.88) | 0.1771 |
|            | TC           | Yes | 57  | 106.40±7.55 | 1.63(1.35)  | 0.2292 | 72.54±6.03 | 0.06(1.07)  | 0.9536 |
|            | TT           | Yes | 8   | 108.75±9.91 | 2.46(2.87)  | 0.3922 | 74.75±6.67 | 1.47(2.27)  | 0.5193 |
|            | <i>P</i> 交互项 |     |     |             |             | 0.8841 |            |             | 0.0348 |

---

Abbreviations: VitD, vitamin D; SBP, systolic blood pressure; DBP, diastolic blood pressure.

Adjusted for pre-pregnancy BMI, maternal age, gestational weight gain, educational level, parity, basal blood pressure and the seasons of blood pressure measurement.

Table S12. The association of single SNP and VitD at T3 with blood pressure at T3.

| SNP            | Genotypes    | VitD<br>deficiency | N   | SBP, mmHg   |             |          | DBP, mmHg  |             |          |
|----------------|--------------|--------------------|-----|-------------|-------------|----------|------------|-------------|----------|
|                |              |                    |     | Mean ± SD   | β(se)       | <i>P</i> | Mean ± SD  | β(se)       | <i>P</i> |
| <i>CYP24A1</i> |              |                    |     |             |             |          |            |             |          |
| rs2248137      | GG           | No                 | 339 | 109.30±10.6 | Ref         |          | 70.07±8.04 | Ref         |          |
|                | GC           | No                 | 106 | 109.65±9.29 | 0.39(1.11)  | 0.7238   | 72.53±6.81 | 1.85(0.86)  | 0.0307   |
|                | CC           | No                 | 195 | 109.11±9.97 | -0.11(0.88) | 0.8986   | 70.01±8.54 | -0.18(0.68) | 0.7914   |
|                | GG           | Yes                | 131 | 110.80±10.5 | 1.39(1.03)  | 0.1767   | 71.18±7.61 | 0.51(0.80)  | 0.5200   |
|                | GC           | Yes                | 63  | 107.21±8.66 | -2.33(1.39) | 0.0945   | 73.19±6.15 | 1.94(1.08)  | 0.0736   |
|                | CC           | Yes                | 90  | 107.82±9.86 | -1.86(1.17) | 0.1138   | 71.60±7.25 | 0.98(0.91)  | 0.2822   |
|                | <i>P</i> 交互项 |                    |     |             |             | 0.0361   |            |             | 0.6400   |

Abbreviations: VitD, vitamin D; SBP, systolic blood pressure; DBP, diastolic blood pressure.

Adjusted for pre-pregnancy BMI, maternal age, gestational weight gain, educational level, parity, basal blood pressure and the seasons of blood pressure measurement.

Table S13. The association of single SNP and VitD at T2 with blood pressure at T3.

| SNP            | Genotypes    | VitD<br>deficiency | N   | SBP, mmHg   |             |          | DBP, mmHg  |             |          |
|----------------|--------------|--------------------|-----|-------------|-------------|----------|------------|-------------|----------|
|                |              |                    |     | Mean ± SD   | β(se)       | <i>P</i> | Mean ± SD  | β(se)       | <i>P</i> |
| <i>CYP24A1</i> |              |                    |     |             |             |          |            |             |          |
| rs6127118      | GG           | No                 | 220 | 109.82±9.86 | Ref         |          | 71.15±7.78 | Ref         |          |
|                | AG           | No                 | 371 | 109.69±10.8 | -0.42(0.85) | 0.6243   | 69.98±7.79 | -1.34(0.65) | 0.0378   |
|                | AA           | No                 | 17  | 106.82±6.82 | -3.29(2.52) | 0.1920   | 71.12±6.00 | -1.07(1.92) | 0.5781   |
|                | GG           | Yes                | 186 | 107.68±8.99 | -1.87(1.00) | 0.0616   | 71.19±7.85 | -0.08(0.76) | 0.9161   |
|                | AG           | Yes                | 305 | 109.35±10.5 | -0.64(0.89) | 0.4700   | 72.02±7.97 | 0.58(0.67)  | 0.3931   |
|                | AA           | Yes                | 24  | 107.67±10.1 | -2.68(2.16) | 0.2148   | 73.67±5.86 | 1.79(1.64)  | 0.2754   |
|                | <i>P</i> 交互项 |                    |     |             |             | 0.2294   |            |             | 0.0236   |

Abbreviations: VitD, vitamin D; SBP, systolic blood pressure; DBP, diastolic blood pressure.

Adjusted for pre-pregnancy BMI, maternal age, gestational weight gain, educational level, parity, basal blood pressure and the seasons of blood pressure measurement.
